# Supplementary material
Source: PubMed Central journal article supplement (PMC4121367)
Supplement: epi-9-566-s02.pdf [file epi-9-566-s02.pdf]

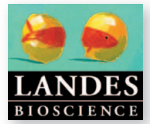

## **Supplemental Material to:**

**Ramon M Rodriguez, Beatriz Suarez-Alvarez, Ruben Salvanés, Covadonga Huidobro, Estela G Toraño, Jose L Garcia-Perez, Carlos Lopez-Larrea, Agustin F Fernandez, Clara Bueno, Pablo Menendez, and Mario F Fraga**

**Role of BRD4 in hematopoietic differentiation of embryonic stem cells**

**Epigenetics 2014; 9(4)**

**<http://dx.doi.org/10.4161/epi.27711>**

**<http://www.landesbioscience.com/journals/epigenetics/article/27711/>**

## Supplemental information

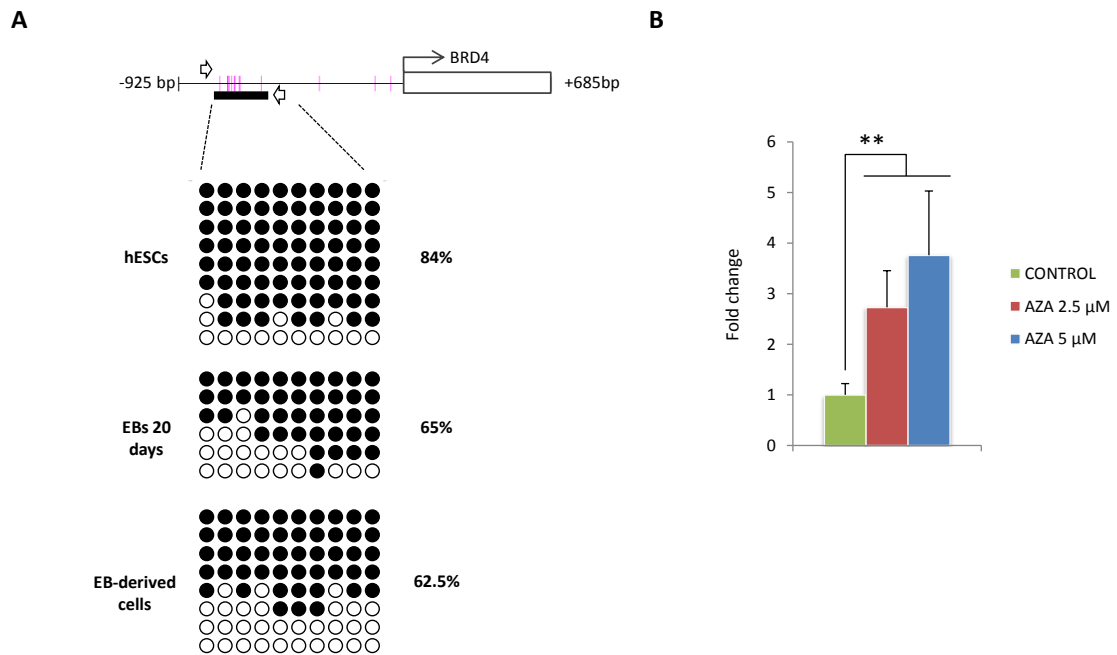

**Figure S1. Bisulphite sequencing analysis of DNA methylation status of the BRD4 promoter and AZA treatment. (A)** The amplified region in the BRD4 promoter contains 10 CpG sites, is located at 776 bp from the transcription start site and includes all CpG sites analyzed by pyrosequencing. **(B)** Relative BRD4 expression in ESCs after 48h incubation with 2  $\mu$ mol/L 5-aza-2'-deoxycytidine (AZA).

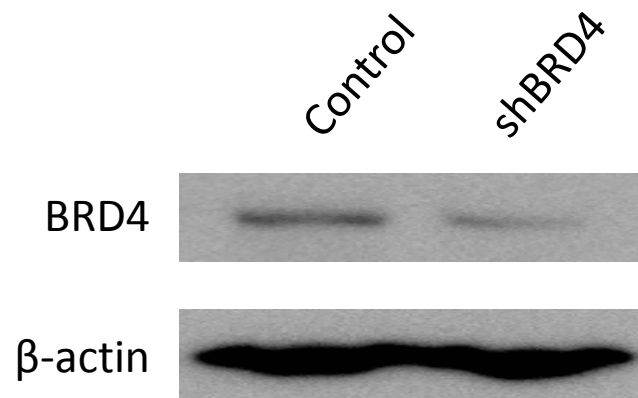

**Figure S2. BRD4 downregulation after shBRD4 transfection analyzed by western blotting.**

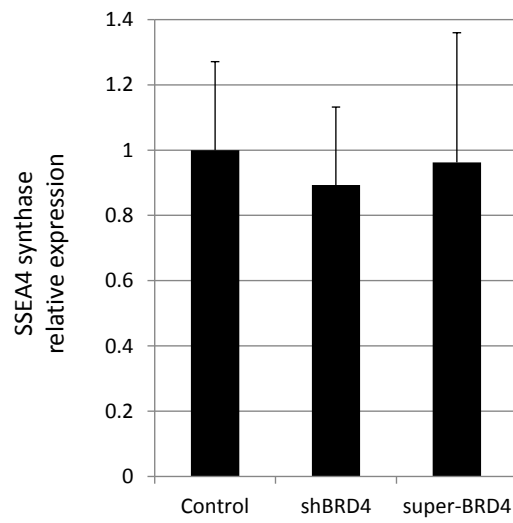

**Figure S3. SSEA4 synthase (ST3 Beta-Galactoside Alpha-2,3-Sialyltransferase 2) expression analyzed by qPCR.**

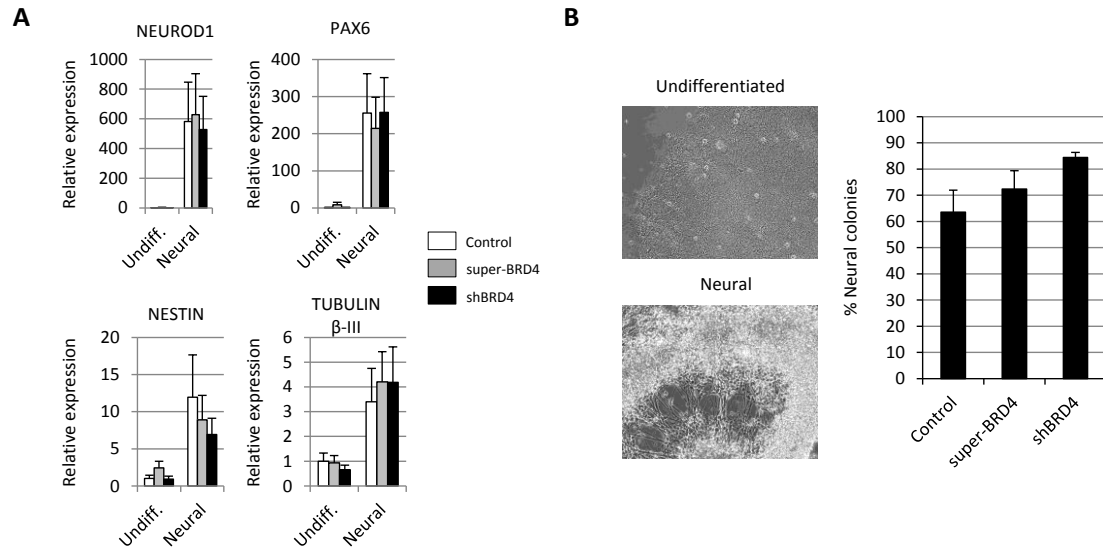

**Figure S4. Early neuroectodermal specification is not affected by BRD4 levels. (A)** qRT-PCR analysis of neuroectodermal markers after neural differentiation of control, shBRD4 and super-BRD4 ESCs. **(B)** Quantification of neural colonies on MS-5 co-culture by morphology criteria. Data is represented as the mean value  $\pm$ SD of five independent experiments.

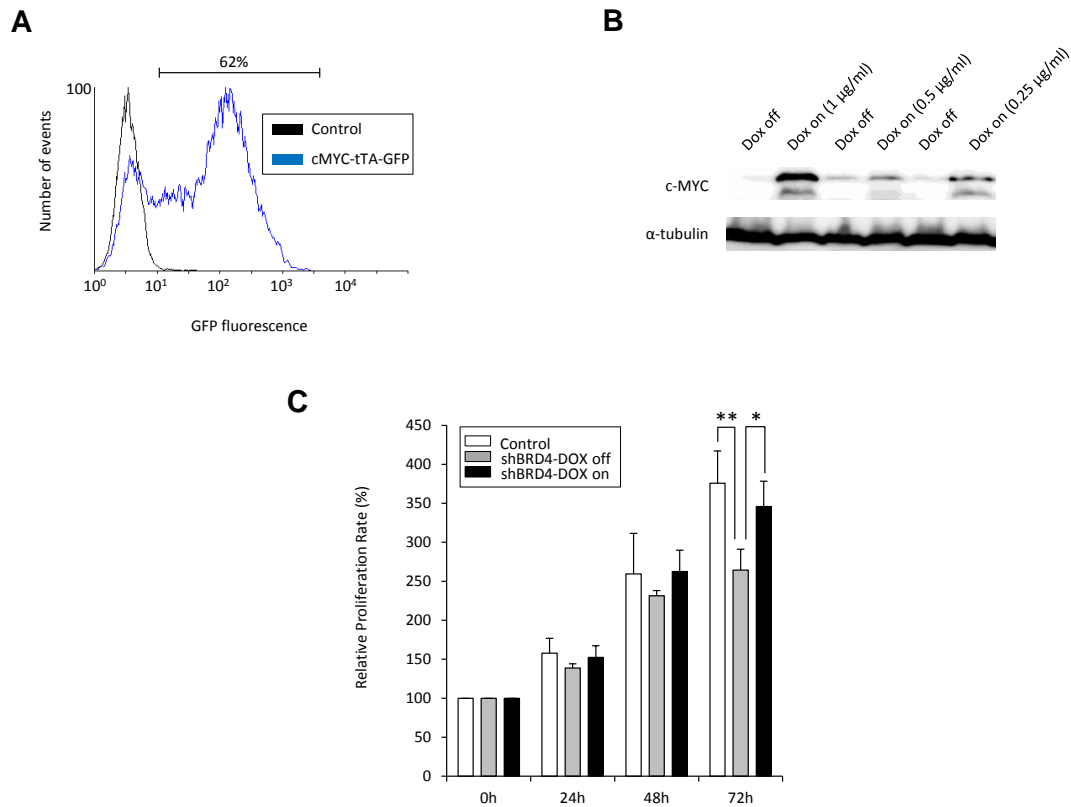

**Figure S5. Human c-MYC overexpression in ESCs with an inducible lentiviral vector LV-TRE-cMyc-Ubc-tTA-I2G. (A)** Transduction efficiency in ESCs. **(B)** c-MYC induction in ESCs upon 48 h treatment with different doses of doxycycline. **(C)** Proliferation of shBRD4 ESCs after c-MYC induction with 1 µg/ml of doxycycline, analyzed by MTT assay and represented as the mean value  $\pm$ SD of three independent experiments (\*  $p \leq 0.05$ ) (\*\*  $p \leq 0.01$ ).

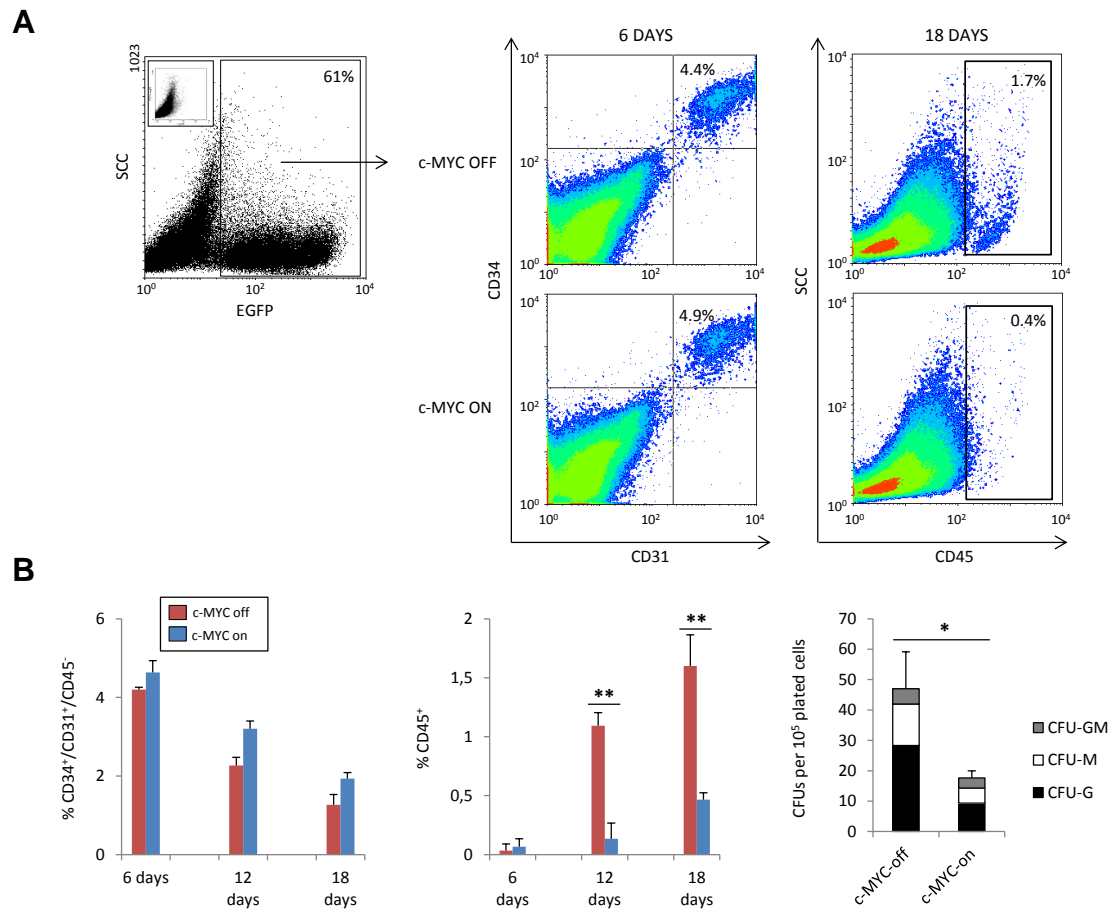

**Figure S6. Human c-Myc overexpression during hematopoietic differentiation of wild type ESCs. (A)** Representative dot plots of hematopoietic differentiation of ESCs, with or without c-MYC overexpression, in response to doxycycline. **(B)** Percentage of CD34<sup>+</sup>/CD31<sup>+</sup>/CD45<sup>-</sup> cells, CD45<sup>+</sup> cells and, colony forming unit (CFU) potential after c-MYC overexpression (\* p<0.05) (\*\* p<0.01).

Table S1. Primers used in qRT-PCR (5' to 3').

|         |                                                              |
|---------|--------------------------------------------------------------|
| OCT4    | Fw: GTCTCCGTCACCACTCTG<br>Rv: AACCTGGCACAAACTCC              |
| NANOG   | Fw: ACTCTCCAACATCCTGAACCTC<br>Rv: CTTCTGCGTCACACCATTGC       |
| DNMT3b  | Fw: TACACAGACGTGTCCAACATGGGC<br>Rv: GGATGCCTTCAGGAATCACACCTC |
| NEUROD1 | Fw: CGCTGGAGCCCTTCTTTG<br>Rv: GCGGACGGTTCGTGTTTG             |
| NESTIN  | Fw: AGCCCTGACCACTCCAGTTTAG<br>Rv: CCCTCTATGGCTGTTTCTTTCTCT   |
| PAX6    | Fw: TTTGCCCGAGAAAGACTAGC<br>Rv: CATTGGCCCTTCGATTAGA          |
| TUBB3   | Fw: AGCAAGAACAGCAGCTACTTCGT<br>Rv: GATGAAGGTGGAGGACATTTTGA   |
| TAL1    | Fw: GGATGCCTTCCCTATGTTCA<br>Rv: GGTGTGGGGACCATCAGTAA         |
| HOXA9   | Fw: GATCCCAATAACCCAGCAG<br>Rv: CCCTGGTGAGGTACATGTTG          |
| PECAM   | Fw: ATCATTCTAGCGCATGGCCTGGT<br>Rv: ATTTGTGGAGGGCGAGGTCATAGA  |
| CD34    | Fw: AAATCCTCTTCTCTGAGGCTGGA<br>Rv: AAGAGGCAGCTGGTGATAAGGGTT  |
| AFP     | Fw: GAGGGAGCGGCTGACATTATT<br>Rv: TGGCCAACACCAGGGTTTA         |
| SOX17   | Fw: CTTTCATGGTGTGGGCTAAGG<br>Rv: GTACTIONTGTAGTTGGGGTGGTCCT  |
| LAMA1   | Fw: CAGGACCCATTACCCTTTTG                                     |



|         |                           |
|---------|---------------------------|
|         | Rv: GCCCTGCTTGGTTTCTTTATT |
| SFTPD   | Fw: ACACAGGCTGGTGGATAGTTG |
|         | Rv: TGTTGCAAGGCGGCATT     |
| c-MYC   | Fw: AGGGATCGCGCTGAGTATAA  |
|         | Rv: TGCCTCTCGCTGGAATTACT  |
| ST3GAL2 | Fw: TGGACGGGCACAACCTTCATC |
|         | Rv: GGGCAGGTTCTTGGCACTCT  |
| GAPDH   | Fw: ACAGTCAGCCGCATCTTC    |
|         | Rv: CTCCGACCTTCACCTTCC    |

---

Table S2. Primers used in ChIP (5' to 3').

---

|                 |                                                      |
|-----------------|------------------------------------------------------|
| A (-2409/-2300) | Fw: TCCCCTTTCCCAATAAATC<br>Rv: AAACCCTAAAACGGCCAAAC  |
| B (-2075/-1956) | Fw: TTTAAGGAACCGCCTGTCC<br>Rv: ACTGGCAGCAGAGATCATCG  |
| C (-1880/-1779) | Fw: TGCAGCAAATCCAGCATAG<br>Rv: TGCACTGCACAATTCAGCTT  |
| D (-1671/-1586) | Fw: CCCCCGAATTGTTTTCTCTT<br>Rv: TCTCATCCTTGGTCCCTCAC |
| E (-1426/-1329) | Fw: CGTTTGCGGGTTACATACAG<br>Rv: TAAAATTTGGCTGCCTTCCA |
| F (-100/-7)     | Fw: GGGTTCCCAAAGCAGAGG<br>Rv: CGTCCAGACCCTCGCATTAT   |
| G (+267/+376)   | Fw: GAGATCCGGAGCGAATAGG<br>Rv: GCTGCTATGGGCAAAGTTTC  |
| H (+1043/+1147) | Fw: CATTCTGACAGCCGGAGAC<br>Rv: AAAAGCCAAATGCCAACTTC  |

---
